# Supplementary material for: Optimum Inhibition of Amphotericin-B-Resistant Candida albicans Strain in Single- and Mixed-Species Biofilms by Candida and Non-Candida Terpenoids
Source: MDPI journal article supplement (doi:10.3390/biom10020342), 2020-02-21
Supplement: s1 [file s1]

## Supplementary Tables

**Supplementary Table 1.** Minimum inhibitory concentrations (MIC) and minimum fungicidal concentrations (MFC) of farnesol against *C. albicans* clinical isolates and TCC10231 strains.

| Strains   | MIC<br>(mg/mL ) | MFC<br>(mg/mL ) |
|-----------|-----------------|-----------------|
| A1        | 16.8            | 33.6            |
| A2        | 33.6            | 67.2            |
| A3        | 33.6            | 33.6            |
| A4        | 33.6            | 67.2            |
| A5        | 33.6            | 67.2            |
| A6        | 33.6            | 33.6            |
| A7        | 33.6            | 67.2            |
| A8        | 16.8            | 33.6            |
| A9        | 33.6            | 67.2            |
| A10       | 33.6            | 33.6            |
| A11       | 33.6            | 33.6            |
| A12       | 33.6            | 33.6            |
| A14       | 16.8            | 16.8            |
| A13       | 33.6            | 33.6            |
| A15       | 33.6            | 33.6            |
| ATCC10231 | 33.6            | 33.6            |

**Supplementary Table 2.** Minimum Inhibitory Concentrations (MIC) and Minimum Fungicidal Concentration (MFC) of carvacrol and cuminaldehyde against *C. albicans* ATCC10231 and *C. albicans* strains isolated from medical devices at the Tlemcen University Hospital.

| <i>Candida</i><br>strains | MIC and MFC (mg/mL) |     |               |     |
|---------------------------|---------------------|-----|---------------|-----|
|                           | Carvacrol           |     | Cuminaldehyde |     |
|                           | MIC                 | MFC | MIC           | MFC |
| ATCC10231                 | 0.5                 | 0.5 | 4             | 4   |
| A1                        | 0.5                 | 1   | 4             | 4   |
| A2                        | 0.5                 | 0.5 | 4             | 4   |
| A3                        | 1                   | 2   | 4             | 4   |
| A4                        | 0.25                | 0.5 | 2             | 3   |
| A5                        | 1                   | 1   | 4             | >4  |
| A6                        | 0.5                 | 0.5 | 3             | 4   |
| A7                        | 0.5                 | 0.5 | 4             | 4   |
| A8                        | 1                   | 1   | 4             | >4  |
| A9                        | 1                   | 1   | 4             | 4   |
| A10                       | 0.5                 | 0.5 | 4             | 4   |
| A11                       | 1                   | 2   | 4             | 4   |
| A12                       | 0.5                 | 0.5 | 2             | 2   |
| A13                       | 1                   | 2   | 4             | >4  |
| A14                       | 0.5                 | 0.5 | 4             | 4   |
| A15                       | 1                   | 2   | 4             | 4   |

**Supplementary Table 3.** Minimum Inhibitory Concentrations (MIC) and Minimum Bactericidal Concentrations (MBC) of carvacrol and cuminaldehyde against bacteria co-isolated with *C. albicans*.

| Bacteria strains | MIC and MBC (mg/mL) |     |               |     |
|------------------|---------------------|-----|---------------|-----|
|                  | Carvacrol           |     | Cuminaldehyde |     |
|                  | MIC                 | MBC | MIC           | MBC |
| Ec2              | 1                   | 1   | 1             | 1   |
| Ec4              | 1                   | 1   | 1             | 1   |
| Ec13             | 1                   | 1   | 1             | 1   |
| Ps2              | 1                   | 1   | 1             | 1   |
| Ps3              | 1                   | 1   | 1             | 1   |
| Ab7              | 1                   | 1   | 1             | 1   |
| Ab11             | 1                   | 1   | 2             | 2   |
| Kp18             | 1                   | 1   | 1             | 1   |
| Se2              | 1                   | 1   | 3             | 3   |
| Se3              | 1                   | 1   | 1             | 1   |
| Se9              | 1                   | 1   | 2             | 2   |
| Se10             | 1                   | 1   | >4            | >4  |
| Sa6              | 1                   | 1   | 2             | 2   |
| Sa11             | 1                   | 1   | 2             | 2   |
| Sa24             | 1                   | 1   | 2             | 2   |
| Pm16             | 1                   | 1   | 2             | 2   |

**Supplementary Table 4.** Interactions of carvacrol and cuminaldehyde against mono-species biofilm formed by *C. albicans* clinical isolates (SMIC<sub>50</sub>)

| <i>Candida</i><br>strains | SMIC (mg/mL) |               |                              |      |
|---------------------------|--------------|---------------|------------------------------|------|
|                           | Carvacrol    | Cuminaldehyde | Carvacrol /<br>Cuminaldehyde | FICI |
| <b>ATCC10231</b>          | 0.75         | 6             | 0.125/2                      | 0.49 |
| <b>A5</b>                 | 1.5          | 7             | 0.25/1                       | 0.30 |
| <b>A6</b>                 | 1.5          | 6             | 0.25/1                       | 0.33 |
| <b>A7</b>                 | 1.5          | 6             | 0.125/1                      | 0.24 |
| <b>A2</b>                 | 1.5          | 7             | 0.25/2                       | 0.44 |
| <b>A10</b>                | 1            | 7             | 0.06/2                       | 0.34 |

SMIC<sub>50</sub>: Sessile MIC, defined as the concentration that causes 50% reduction in optical density of the biofilms compared to the optical density of the untreated biofilm formed by the same isolates; FICI : fractional inhibitory concentration index

**Supplementary Table 5.** Interactions of carvacrol and cuminaldehyde against mono-species biofilm formed by *C. albicans* clinical isolates (SMIC<sub>80</sub>)

| <i>Candida</i><br>strains | SMIC (mg/mL) |               |                              |      |
|---------------------------|--------------|---------------|------------------------------|------|
|                           | Carvacrol    | Cuminaldehyde | Carvacrol /<br>Cuminaldehyde | FICI |
| <b>ATCC10231</b>          | 1            | 6             | 0.25/1                       | 0.41 |
| <b>A5</b>                 | 2            | 8             | 0.5/2                        | 0.5  |
| <b>A6</b>                 | 2            | 8             | 0.25/1                       | 0.25 |
| <b>A7</b>                 | 2            | 8             | 0.25/2                       | 0.37 |
| <b>A2</b>                 | 2            | 8             | 0.5/4                        | 0.75 |
| <b>A10</b>                | 2            | 8             | 0.12/4                       | 0.56 |

SMIC<sub>80</sub> : sessile MIC, defined as the concentration that causes 80% reduction in biofilms formation.

**Supplementary Table 6.** Interactions of carvacrol with farnesol against planktonic cells of *C. albicans* after 48h of incubation.

| Strains          | MIC (mg/mL) |          |                        | FICI | Interactions |
|------------------|-------------|----------|------------------------|------|--------------|
|                  | Carvacrol   | Farnesol | Carvacrol/<br>Farnesol |      |              |
| <b>ATCC10231</b> | 0.5         | 33.6     | 0.03+0.2               | 0.06 | Synergy      |
| <b>A1</b>        | 0.5         | 16.8     | 0.125+1.2              | 0.33 | Synergy      |
| <b>A2</b>        | 0.5         | 33.6     | 0.03+1.2               | 0.10 | Synergy      |
| <b>A3</b>        | 1           | 33.6     | 0.06+0.2               | 0.06 | Synergy      |
| <b>A4</b>        | 0.25        | 33.6     | 0.03+0.4               | 0.13 | Synergy      |
| <b>A5</b>        | 1           | 33.6     | 0.125+1.2              | 0.17 | Synergy      |
| <b>A6</b>        | 0.5         | 33.6     | 0.06+1.2               | 0.16 | Synergy      |
| <b>A7</b>        | 0.5         | 33.6     | 0.125+0.4              | 0.26 | Synergy      |
| <b>A8</b>        | 1           | 16.8     | 0.25+0.4               | 0.28 | Synergy      |
| <b>A9</b>        | 1           | 33.6     | 0.25+0.4               | 0.26 | Synergy      |
| <b>A10</b>       | 0.5         | 33.6     | 0.06+0.8               | 0.15 | Synergy      |
| <b>A11</b>       | 1           | 33.6     | 0.25+0.8               | 0.28 | Synergy      |
| <b>A12</b>       | 0.5         | 33.6     | 0.125+1.2              | 0.29 | Synergy      |
| <b>A13</b>       | 1           | 33.6     | 0.25+0.8               | 0.28 | Synergy      |
| <b>A14</b>       | 0.5         | 16.8     | 0.125+1.2              | 0.33 | Synergy      |
| <b>A15</b>       | 1           | 33.6     | 0.125+0.8              | 0.15 | Synergy      |

## Supplementary Figures

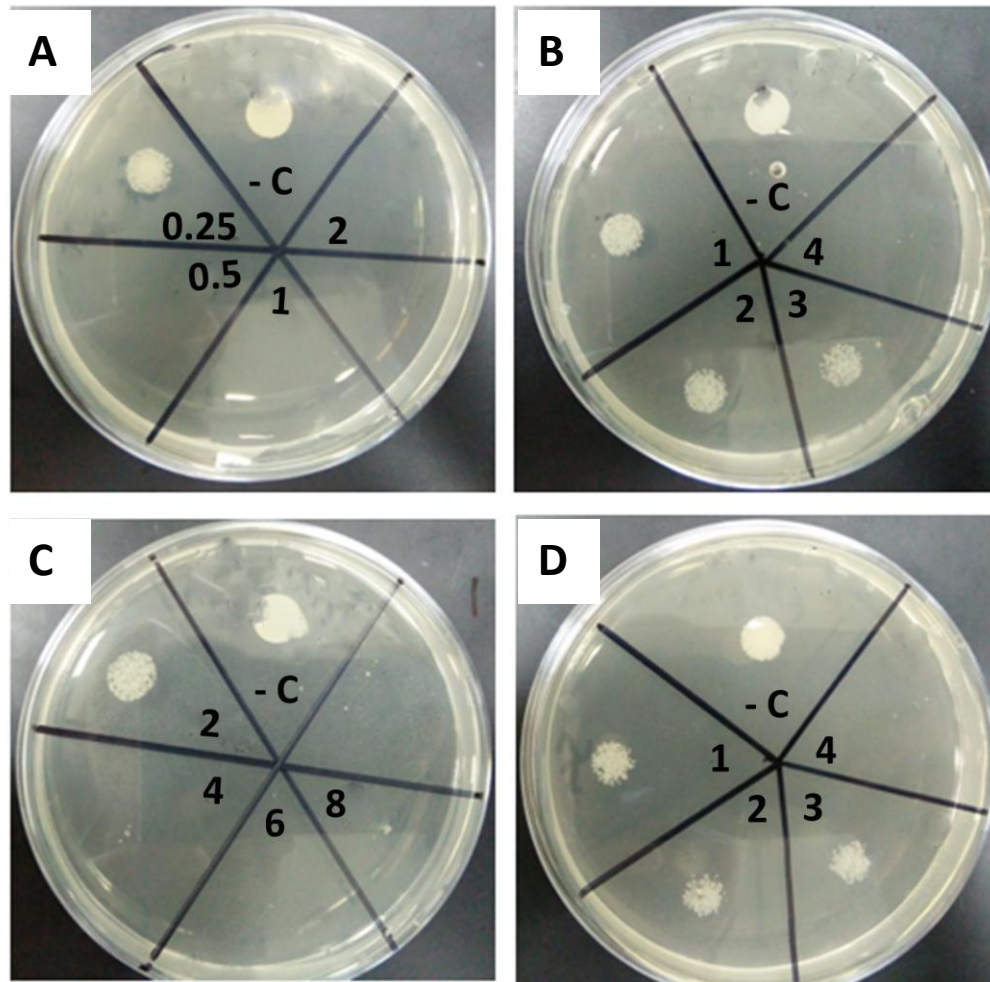

**Supplementary Figure 1. Spot test assay of carvacrol and cuminaldehyde at different concentration on *Candida* spp.** (A) Effect of carvacrol on *C. albicans* ATCC10231 reference strain. (B) Effect of carvacrol on *C. albicans* A5 clinical isolate. (C) Effect of cuminaldehyde on *C. albicans* ATCC10231. (D) Effect of cuminaldehyde on A5.

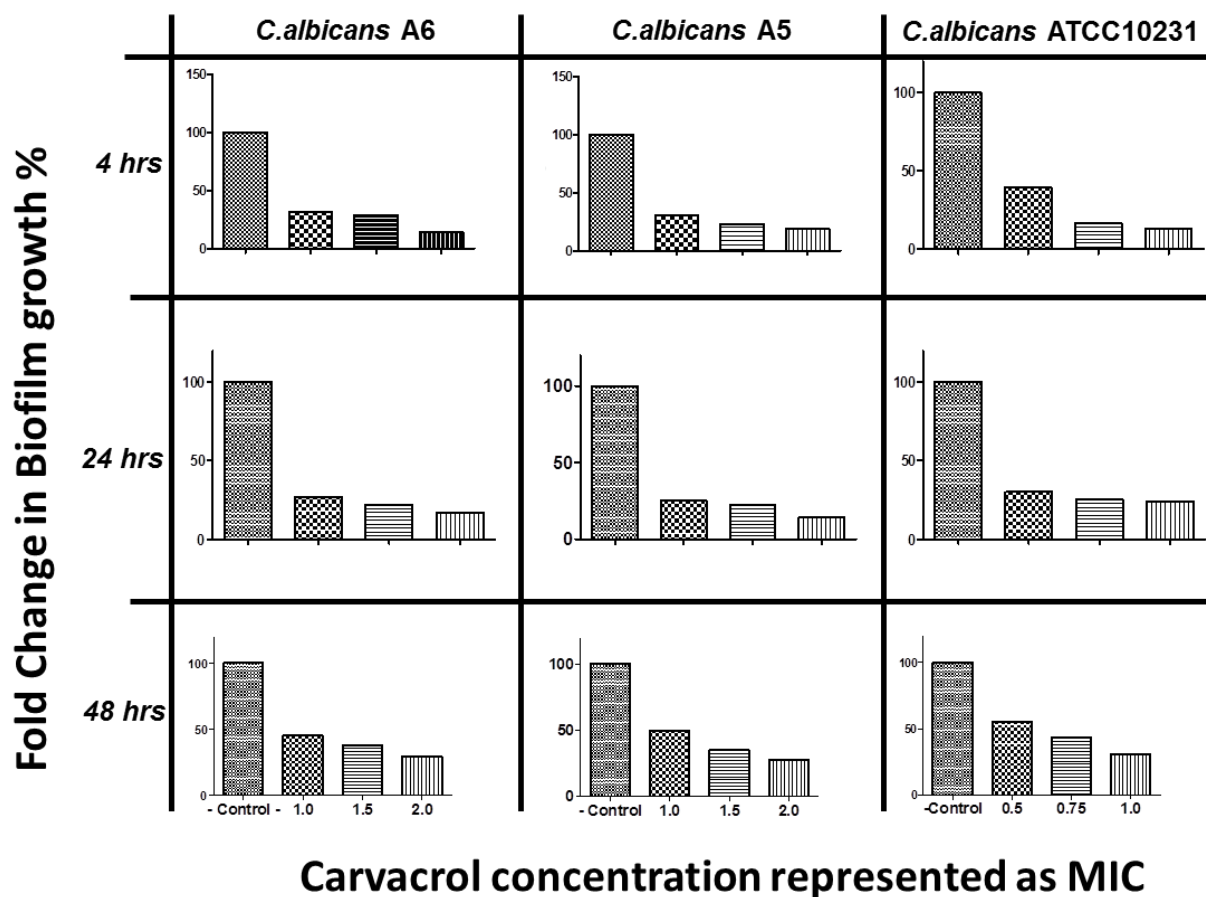

**Supplementary Figure 2.** The inhibitory effect of carvacrol on *C. albicans* biofilm formation at different time points and determined by MTT reduction assays. *C. albicans* cells were allowed to adhere to 96-well plates at different times (4h, 24h and 48h), followed by treatment with various MIC concentrations of carvacrol including 1.0, 1.5 and 2.0MIC prior to incubation at 37°C. The antibiofilm activity of the compound was assessed in terms of metabolic activity by the MTT assay.



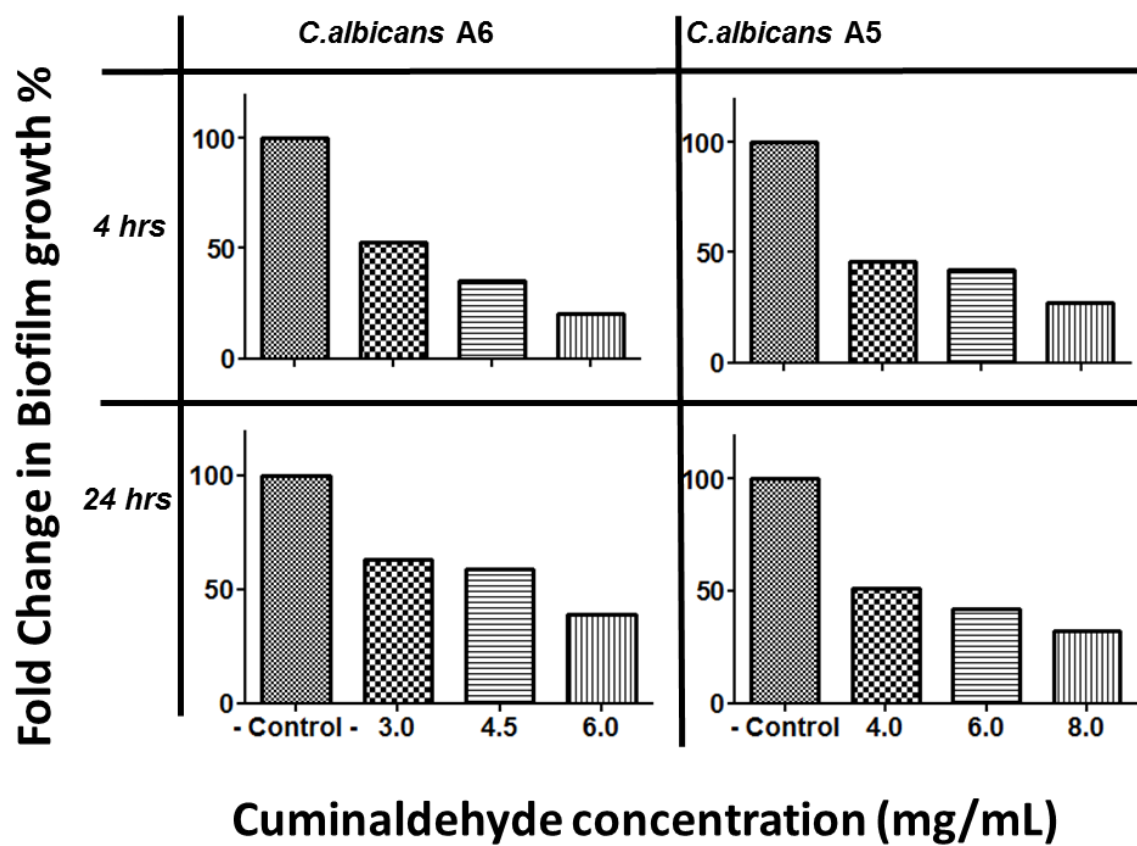

Supplementary Figure 3. The inhibitory effects of cuminaldehyde on *C. albicans* biofilm formation.
